# Supplementary material
Source: publisher figshare collection journal article supplement (https://acs.figshare.com/ndownloader/files/9624880)
Supplement: Supplementary file 1 [file 9624880]

# Heat-treated Stainless Steel Felt as a New Cathode Material in a Methane-producing Bioelectrochemical System

Dandan Liu<sup>1</sup>, Tianye Zheng<sup>1</sup>, Cees Buisman<sup>1</sup>, Annemiek ter Heijne<sup>1\*</sup>

<sup>1</sup> Sub-Department of Environmental Technology, Wageningen University & Research, Bornse Weiland 9, 6708 WG Wageningen, The Netherlands

**Corresponding Author: Annemiek ter Heijne (E-mail: [annemiek.terheijne@wur.nl](mailto:annemiek.terheijne@wur.nl))**

**3 pages, 1 Table, 2 Figures.**

Table S1. Overview of operational conditions during the experiment.

| <b>Experimental<br/>condition</b> | <b>HSSF (weeks)</b> |    | <b>SSF (weeks )</b> |    | <b>GF (weeks)</b> |    |
|-----------------------------------|---------------------|----|---------------------|----|-------------------|----|
|                                   | <b>Reacotr 1</b>    |    | <b>Reactor 2</b>    |    | <b>Reactor 3</b>  |    |
|                                   | I                   | II | I                   | II | I                 | II |
| -0.9 V                            | 3                   |    | 3                   |    | 3                 |    |
| -1.1 V                            | 4                   |    | 4                   |    | 4                 |    |
| -0.8 V                            | 4                   |    | 4                   |    | 4                 |    |
| -1.3 V                            | 4                   |    | 4                   |    | 4                 |    |

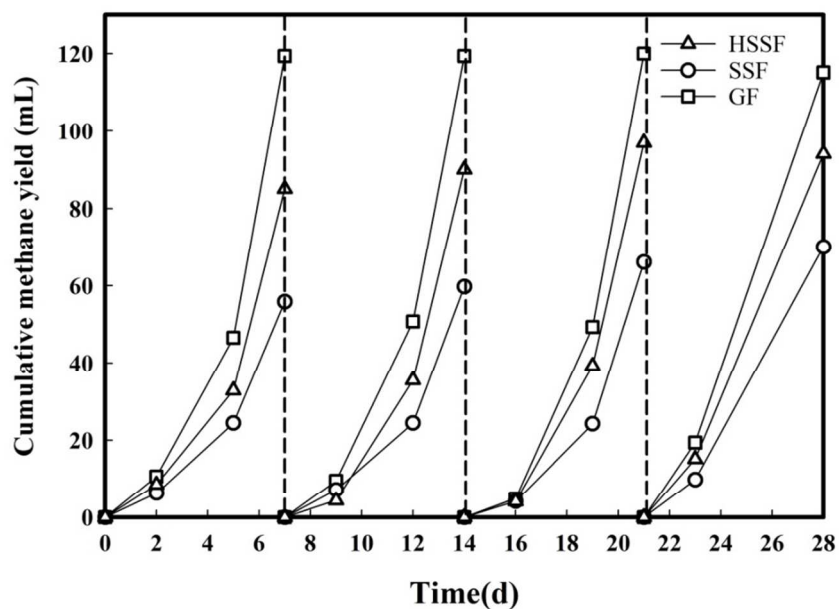

Figure S1. Cumulative methane yields over four consecutive batches for all the three cathode materials at the cathode potential of -1.3 V. The dashed lines indicate 50 % medium replacement at the end of each batch.

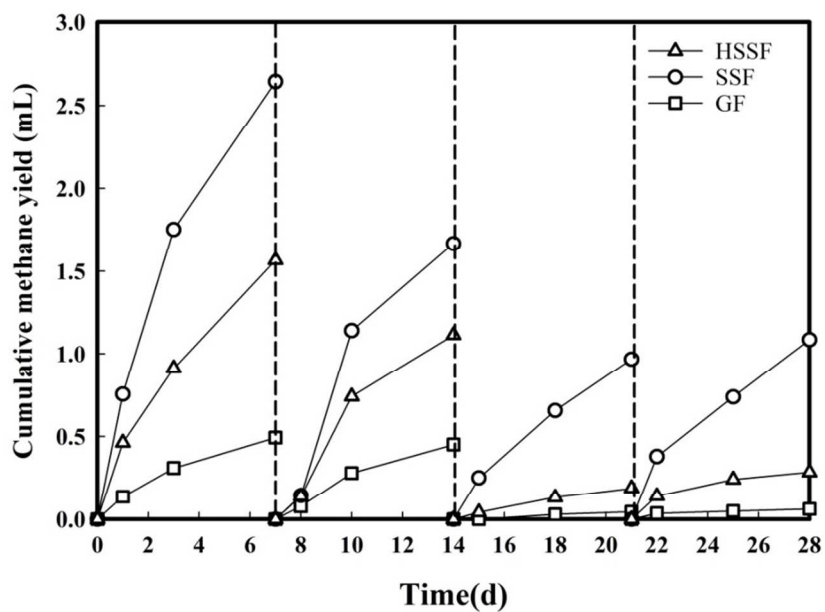

Figure S2. Cumulative methane yields over four consecutive batches for all the three cathode materials at the cathode potential of -0.8 V. The dashed lines indicate 50 % medium replacement at the end of each batch.
